# Supplementary material for: Melittin—A Natural Peptide from Bee Venom Which Induces Apoptosis in Human Leukaemia Cells
Source: MDPI journal article supplement (doi:10.3390/biom10020247), 2020-02-06
Supplement: s1 [file s1]

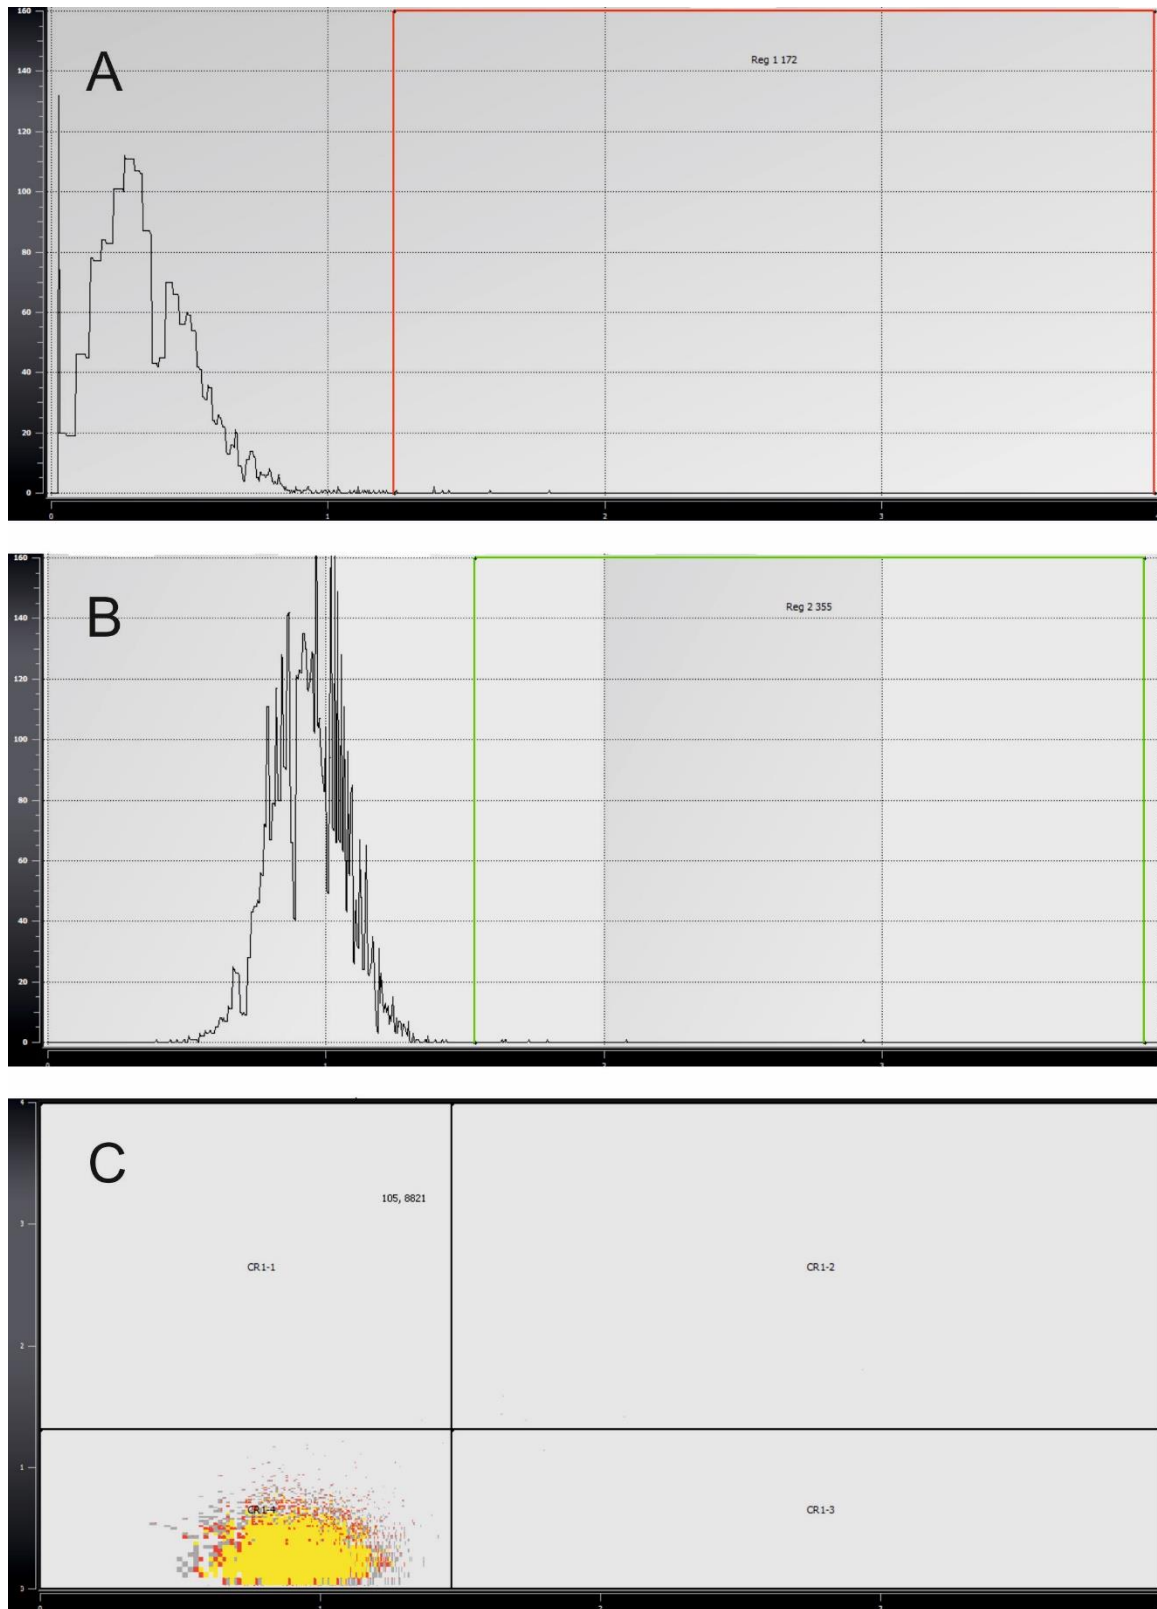

Figure S1. Gating strategies during flow cytometric analysis. Gates established on unlabelled cells. The figure is presenting selected analysis for the control sample. A – histogram for PI analysis; B – histogram for FITC; C – dot plot where x is FITC channel and y is the channel for PI. Pictures were generated from the flow cytometer PARTEC CUBE 6 (Görlitz, Germany) CyFlow software version 1.5.1.2.
